# Supplementary material
Source: PubMed Central journal article supplement (PMC3592082)
Supplement: JCM.02638-12_zjm999092352so1.pdf [file JCM.02638-12_zjm999092352so1.pdf]

Table S1. *mutS* gene mutations in CF *P. aeruginosa* with strong increased spontaneous frequency of mutation (SISf).

| Isolate No | Patient Id | <i>mutS</i> gene position | Mutation type     | Nucleotide change | Amino acid change |
|------------|------------|---------------------------|-------------------|-------------------|-------------------|
| 223 PA     | 1          | 195                       | base substitution | g>c               | R>P               |
|            |            | 264                       | base substitution | c>t               | T>I               |
| 434 PA     | 2          | 117                       | base substitution | a>g               | N>S               |
|            |            | 141                       | base substitution | a>g               | H>R               |
|            |            | 288                       | base substitution | t>g               | V>G               |
|            |            | 294                       | base substitution | g>c               | R>X               |
| 559 PA     | 3          | 117                       | base substitution | a>g               | N>S               |
|            |            | 141                       | base substitution | a>g               | H>R               |
| 608 PA     | 3          | 195                       | base substitution | g>c               | R>P               |
|            |            | 264                       | base substitution | c>t               | T>I               |
| 646 PA     | 4          | 117                       | base substitution | a>g               | N>S               |
|            |            | 141                       | base substitution | a>g               | H>R               |
| 52 RJ      | 5          | 2343                      | base substitution | g>a, c>t          | A>T               |
| 93 RJ      | 6          | 768                       | base substitution | g>c               | R>P               |
| 95 RJ      | 6          | 768                       | base substitution | g>c               | R>P               |

PA: patient from Cystic Fibrosis Reference Center in Porto Alegre, RJ: patient from Cystic Fibrosis Reference Center in Rio de Janeiro, a: adenine c: cytosine, g: guanine, t: thymine, A: Alanine, G: Glutamine, H: Histidine, I: Isoleucine, N: Asparagine, P: Proline, R: Arginine, T: Threonine, V: Valine, X: Unspecified or unknown amino acid.
